# Supplementary material for: Genome of a giant isopod, Bathynomus jamesi, provides insights into body size evolution and adaptation to deep-sea environment
Source: PubMed Central journal article supplement (PMC9107163; doi:10.1186/s12915-022-01302-6), 2022-05-13
Supplement: 12915_2022_1302_MOESM1_ESM.pdf [file 12915_2022_1302_MOESM1_ESM.pdf]

## Supplementary Information for

### Genome of a giant isopod, *Bathynomus jamesi*, provides insights into body size evolution and adaptation to deep-sea environment

Jianbo Yuan<sup>1,2,#</sup>, Xiaojun Zhang<sup>1,2,#</sup>, Qi Kou<sup>1,2,#</sup>, Yamin Sun<sup>3</sup>, Chengzhang Liu<sup>1,2</sup>, Shihao Li<sup>1,2</sup>, Yang Yu<sup>1,2</sup>, Chengsong Zhang<sup>1,2</sup>, Songjun Jin<sup>1,2</sup>, Jianhai Xiang<sup>1,2,\*</sup>, Xinzheng Li<sup>1,2,\*</sup>, Fuhua Li<sup>1,2,\*</sup>

<sup>1</sup> CAS and Shandong Province Key Laboratory of Experimental Marine Biology, Department of Marine Organism Taxonomy & Phylogeny, Center for Ocean Mega-Science, Institute of Oceanology, Chinese Academy of Sciences, Qingdao 266071, China.

<sup>2</sup> Laboratory for Marine Biology and Biotechnology, Qingdao National Laboratory for Marine Science and Technology, Qingdao 266237, China.

<sup>3</sup> Research Center for Functional Genomics and Biochip, Tianjin 300457, China.

<sup>#</sup>These authors contributed equally. \* Correspondence and requests for materials should be addressed to F.L. (fhli@qdio.ac.cn, Orcid ID: 0000-0001-8693-600X), or to X.L. (lixzh@qdio.ac.cn). or to J.X. (jhxiang@qdio.ac.cn, Orcid ID: 0000-0001-5395-7787).

## Supplementary tables

**Table S1. Statistics of genome sequencing data of *B. jamesi*.**

| Clean Reads             | Illumina        | PacBio     |
|-------------------------|-----------------|------------|
| Size of library         | 500 bp          | 20 Kb      |
| Number of reads         | 784,169,503 × 2 | 31,925,544 |
| Average length of reads | 150 bp          | 12,983 bp  |
| Total bases             | 235.25 Gb       | 360.80 Gb  |
| Sequencing depth *      | ~45X            | ~69X       |

\* Genome size ~ 5.24 Gb.

**Table S2. Genome size and repeat contents of the sequenced crustacean genomes.**

| Species                         | Class        | Genome size (Gb) | Repeat contents |
|---------------------------------|--------------|------------------|-----------------|
| <i>Armadillidium vulgare</i>    | Isopoda      | 1.73             | 69.54%          |
| <i>Bathynomus jamesi</i>        | Isopoda      | 5.90             | 85.24%          |
| <i>Litopenaeus vannamei</i>     | Decapoda     | 1.66             | 49.39%          |
| <i>Fenneropenaeus chinensis</i> | Decapoda     | 1.57             | 49.71%          |
| <i>Marsupenaeus japonicus</i>   | Decapoda     | 1.79             | 34.96%          |
| <i>Penaeus monodon</i>          | Decapoda     | 2.39             | 62.50%          |
| <i>Procambarus virginalis</i>   | Decapoda     | 3.29             | 26.59%          |
| <i>Macrobrachium nipponense</i> | Decapoda     | 4.49             | 50.20%          |
| <i>Scylla paramamosain</i>      | Decapoda     | 1.55             | 35.79%          |
| <i>Eriocheir sinensis</i>       | Decapoda     | 1.56             | 35.57%          |
| <i>Paralithodes platypus</i>    | Decapoda     | 4.80             | 77.73%          |
| <i>Portunus trituberculatus</i> | Decapoda     | 1.00             | 54.52%          |
| <i>Callinectes sapidus</i>      | Decapoda     | 0.99             | 36.00%          |
| <i>Procambarus fallax</i>       | Decapoda     | 3.30             | 8.80%           |
| <i>Homarus americanus</i>       | Decapoda     | 2.29             | 52.90%          |
| <i>Daphnia pulex</i>            | Branchiopoda | 0.20             | 20.45%          |
| <i>Eulimnadia texana</i>        | Branchiopoda | 0.12             | 26.40%          |
| <i>Artemia franciscana</i>      | Branchiopoda | 0.85             | 58.00%          |
| <i>Tigriopus californicus</i>   | Copepoda     | 0.24             | 39.00%          |
| <i>Parhyale hawaiiensis</i>     | Amphipoda    | 4.02             | 57.00%          |
| <i>Trinorchestia longiramus</i> | Amphipoda    | 0.89             | 20.35%          |
| <i>Amphibalanus amphitrite</i>  | Cirripedia   | 0.48             | 4.48%           |
| <i>Lepas anserifera</i>         | Cirripedia   | 0.75             | 44.70%          |

**Table S3. Summary of the Illumina sequencing reads coverage on the assembly genome.**

| <b>Coverage of Illumina sequencing reads</b> |               |
|----------------------------------------------|---------------|
| Number of clean reads                        | 1,520,127,222 |
| Percentage of mapped reads                   | 99.80%        |
| Coverage                                     | 96.11%        |
| Coverage at least 5X                         | 90.88%        |
| Coverage at least 10X                        | 85.12%        |
| Coverage at least 20X                        | 71.36%        |
| Coverage at least 50X                        | 21.30%        |

  

| <b>Coverage of RNA-seq sequencing reads</b> |             |
|---------------------------------------------|-------------|
| Number of clean reads                       | 313,907,086 |
| Percentage of mapped reads                  | 84.23%      |

**Table S4. Core gene estimation for *B. jamesi* assembly.**

|                                        | <b>Number</b> | <b>Percentage (%)</b> |
|----------------------------------------|---------------|-----------------------|
| <b>Complete BUSCOs</b>                 | 248           | 81.9                  |
| <b>Complete and single-copy BUSCOs</b> | 219           | 72.3                  |
| <b>Complete and duplicated BUSCOs</b>  | 29            | 9.6                   |
| <b>Fragmented BUSCOs</b>               | 39            | 12.9                  |
| <b>Missing BUSCOs</b>                  | 16            | 5.2                   |
| <b>Total BUSCO groups searched</b>     | 303           | 100                   |

**Table S5. Summary of isopod genome sizes.\***

| <b>Family</b>   | <b>Species</b>               | <b>Common Name</b> | <b>Inhabit</b> | <b>C-value</b> |
|-----------------|------------------------------|--------------------|----------------|----------------|
| Armadillidiidae | <i>Armadillidium sp.</i>     | Pill bug           | Terrestrial    | 2.35           |
| Armadillidiidae | <i>Armadillidium vulgare</i> | Pill bug           | Terrestrial    | 1.96           |
| Asellidae       | <i>Caecidotea forbesi</i>    | Freshwater isopod  | Freshwater     | 1.90           |
| Asellidae       | <i>Caecidotea racovitzae</i> | Freshwater isopod  | Freshwater     | 1.71           |
| Cirolanidae     | Unknown sp.                  | Marine isopod      | Unknown        | 2.40           |
| Cymothoidae     | <i>Nerocila munda</i>        | Parasitic isopod   | Parasitic      | 8.82           |
| Unknown         | Unknown sp.                  | Terrestrial isopod | Terrestrial    | 5.70           |
| Ligiidae        | <i>Ligia hawaiiensis</i>     | Sea roach          | Intertidal     | 3.00           |
| Ligiidae        | <i>Ligia occidentalis</i>    | Western sea roach  | Intertidal     | 3.30           |
| Oniscidae       | <i>Oniscus asellus</i>       | Sow bug            | Terrestrial    | 8.60           |
| Porcellionidae  | <i>Porcellio scaber</i>      | Sow bug            | Terrestrial    | 5.65           |
| Porcellionidae  | <i>Porcellio spinicornis</i> | Sow bug            | Terrestrial    | 3.56           |
| Sphaeromatidae  | <i>Sphaeroma destructor</i>  | Marine isopod      | Shallow        | 6.79           |
| Sphaeromatidae  | Unknown sp.                  | Marine isopod      | Unknown        | 2.80           |

\* The C-values of isopods are referred to the Animal Genome Size Database ([www.genomesize.com](http://www.genomesize.com)).

**Table S6. Summary of the orthologous gene clusters analyzed in 11 species.**

---

| <b>Species name</b>            | <b>No. of coding genes</b> | <b>No. of gene families</b> | <b>No. of specific gene families</b> |
|--------------------------------|----------------------------|-----------------------------|--------------------------------------|
| <i>Bathynomus jamesi</i>       | 23,221                     | 9,268                       | 3,683                                |
| <i>Armadillidium vulgare</i>   | 19,051                     | 7,664                       | 5,294                                |
| <i>Daphnia pulex</i>           | 30,595                     | 7,894                       | 14,264                               |
| <i>Drosophila melanogaster</i> | 13,916                     | 6,497                       | 4,403                                |
| <i>Eriocheir sinensis</i>      | 28,033                     | 8,288                       | 9,515                                |
| <i>Eulimnadia texana</i>       | 23,965                     | 7,747                       | 6,087                                |
| <i>Eurytemora affinis</i>      | 19,856                     | 7,733                       | 6,882                                |
| <i>Litopenaeus vannamei</i>    | 28,273                     | 8,660                       | 9,543                                |
| <i>Parhyale hawaiiensis</i>    | 28,666                     | 8,983                       | 11,150                               |
| <i>Procambarus virginalis</i>  | 21,773                     | 6,100                       | 11,036                               |
| <i>Tigriopus californicus</i>  | 14,536                     | 7,460                       | 3,099                                |

---

**Table S7. The gene family analysis results using CAFE.**

| <b>Species</b>                 | <b>Expanded families</b> | <b>Significantly expanded (<math>P &lt; 0.05</math>)</b> | <b>Contracted families</b> | <b>Significantly contracted (<math>P &lt; 0.05</math>)</b> |
|--------------------------------|--------------------------|----------------------------------------------------------|----------------------------|------------------------------------------------------------|
| <i>Bathynomus jamesi</i>       | 2,428                    | 274                                                      | 814                        | 157                                                        |
| <i>Armadillidium vulgare</i>   | 907                      | 133                                                      | 1,896                      | 279                                                        |
| <i>Daphnia pulex</i>           | 1,130                    | 227                                                      | 1,534                      | 260                                                        |
| <i>Drosophila melanogaster</i> | 640                      | 85                                                       | 3,186                      | 488                                                        |
| <i>Eriocheir sinensis</i>      | 1,687                    | 370                                                      | 1,966                      | 199                                                        |
| <i>Eulimnadia texana</i>       | 2,650                    | 260                                                      | 1,358                      | 208                                                        |
| <i>Eurytemora affinis</i>      | 1,219                    | 131                                                      | 1,158                      | 235                                                        |
| <i>Litopenaeus vannamei</i>    | 1,459                    | 270                                                      | 749                        | 122                                                        |
| <i>Parhyale hawaiiensis</i>    | 1,352                    | 275                                                      | 1,838                      | 241                                                        |
| <i>Procambarus virginalis</i>  | 353                      | 59                                                       | 2,720                      | 380                                                        |
| <i>Tigriopus californicus</i>  | 745                      | 111                                                      | 1,463                      | 267                                                        |

**Table S8. GO enrichment of the expanded gene families of *B. jamesi*.**

| GO terms                  | Description                                                                 | Annotated | Significant | p-value  |
|---------------------------|-----------------------------------------------------------------------------|-----------|-------------|----------|
| <b>Cellular Component</b> |                                                                             |           |             |          |
|                           | mitochondrial outer membrane                                                |           |             |          |
| GO:0005742                | translocase complex                                                         | 13        | 21          | 7.53E-08 |
| GO:0016020                | membrane                                                                    | 241       | 2468        | 7.84E-08 |
| GO:0031968                | organelle outer membrane                                                    | 15        | 41          | 7.00E-06 |
| GO:0031967                | organelle envelope                                                          | 28        | 136         | 3.10E-05 |
| GO:0031985                | Golgi cisterna                                                              | 6         | 9           | 3.06E-04 |
| <b>Molecular Function</b> |                                                                             |           |             |          |
| GO:0005544                | calcium-dependent phospholipid binding                                      | 42        | 55          | 4.94E-30 |
| GO:0003950                | NAD <sup>+</sup> ADP-ribosyltransferase activity                            | 35        | 48          | 6.49E-24 |
| GO:0005543                | phospholipid binding                                                        | 42        | 75          | 3.63E-22 |
| GO:0008236                | serine-type peptidase activity                                              | 98        | 359         | 1.44E-21 |
| GO:0008233                | peptidase activity                                                          | 139       | 748         | 2.06E-14 |
| GO:0008289                | lipid binding                                                               | 43        | 117         | 2.27E-14 |
| GO:0004175                | endopeptidase activity                                                      | 99        | 458         | 2.27E-14 |
| GO:0070011                | peptidase activity, acting on L-amino acid peptides                         | 136       | 729         | 2.35E-14 |
| GO:0005509                | calcium ion binding                                                         | 81        | 371         | 5.65E-12 |
| GO:0004476                | mannose-6-phosphate isomerase activity                                      | 10        | 11          | 1.27E-08 |
| GO:0046872                | metal ion binding                                                           | 191       | 1361        | 3.58E-08 |
| GO:0043169                | cation binding                                                              | 191       | 1368        | 5.14E-08 |
| GO:0004197                | cysteine-type endopeptidase activity                                        | 19        | 48          | 4.05E-07 |
| GO:0035257                | nuclear hormone receptor binding                                            | 8         | 11          | 1.08E-05 |
| GO:0042974                | retinoic acid receptor binding                                              | 8         | 11          | 1.08E-05 |
| GO:0051427                | hormone receptor binding                                                    | 8         | 11          | 1.08E-05 |
| GO:0016861                | intramolecular oxidoreductase activity, interconverting aldoses and ketoses | 10        | 20          | 5.19E-05 |
| GO:0004143                | diacylglycerol kinase activity                                              | 7         | 11          | 1.89E-04 |
| GO:0004497                | monooxygenase activity                                                      | 14        | 42          | 2.00E-04 |
| GO:0016860                | intramolecular oxidoreductase activity                                      | 10        | 24          | 3.48E-04 |
| GO:0008376                | acetylgalactosaminyltransferase activity                                    | 6         | 9           | 5.06E-04 |
| GO:0004180                | carboxypeptidase activity                                                   | 16        | 60          | 1.02E-03 |
| <b>Biological Process</b> |                                                                             |           |             |          |
| GO:0006508                | proteolysis                                                                 | 134       | 756         | 1.11E-14 |
| GO:0006801                | superoxide metabolic process                                                | 14        | 19          | 2.89E-09 |
| GO:0072593                | reactive oxygen species metabolic process                                   | 14        | 22          | 4.14E-08 |
| GO:0050790                | regulation of catalytic activity                                            | 20        | 74          | 3.58E-04 |
| GO:0065009                | regulation of molecular function                                            | 20        | 74          | 3.58E-04 |
| GO:0007205                | protein kinase C-activating G-protein coupled receptor signaling pathway    | 7         | 11          | 9.36E-04 |
| GO:0007219                | Notch signaling pathway                                                     | 5         | 7           | 8.18E-03 |

## Supplementary figures

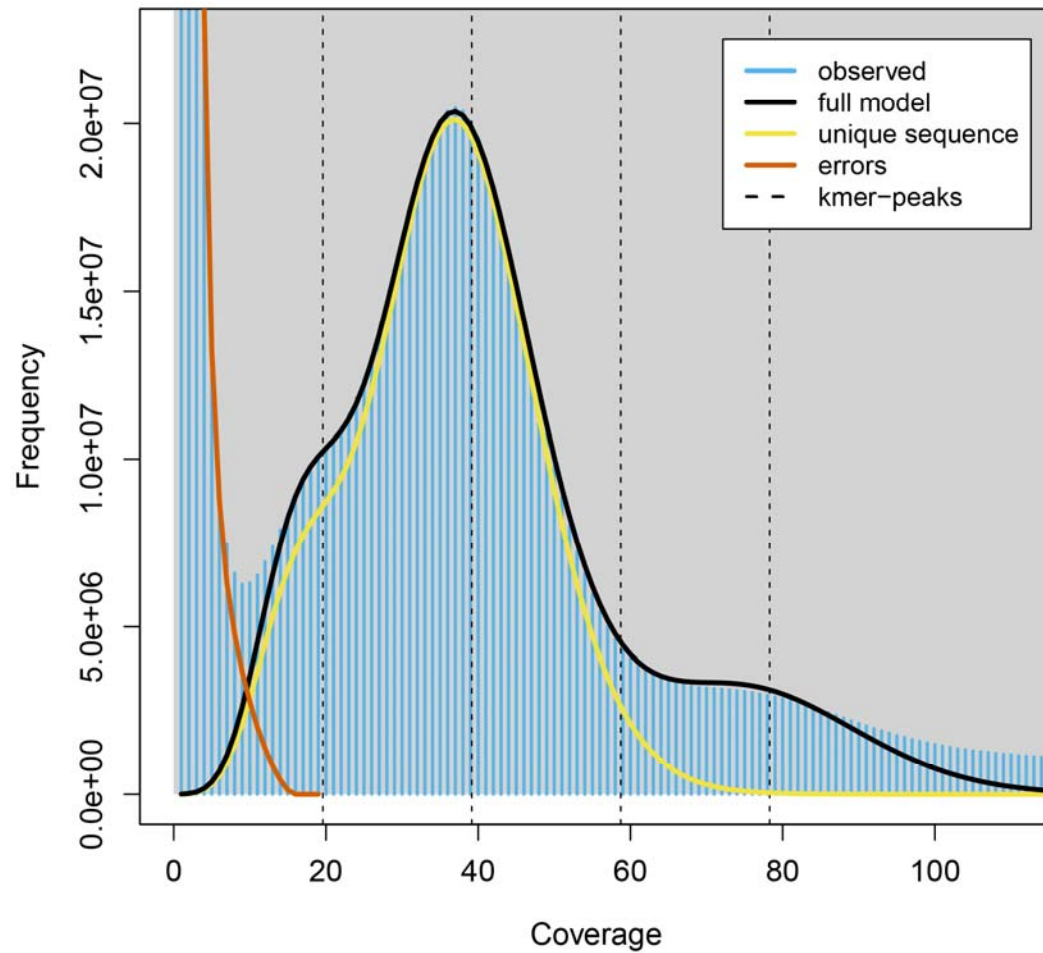

**Figure S1. K-mer distribution of the *B. jamesi* genome sequences.**

K-mer analysis estimated the genome size of *B. jamesi* to be 5.24 Gb. The heterozygous rate was estimated to be 0.69% and the content of repetitive sequences was estimated to be 89.7%.



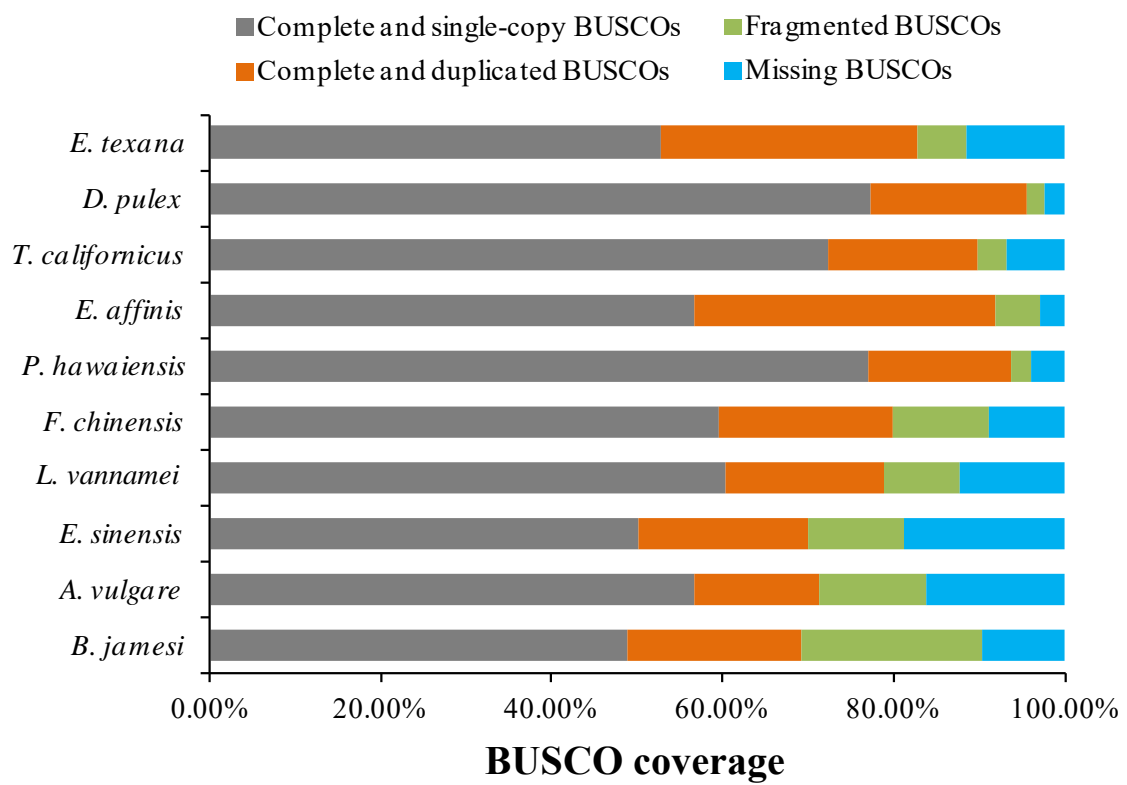

**Figure S2. The core gene coverage of crustacean genomes.**

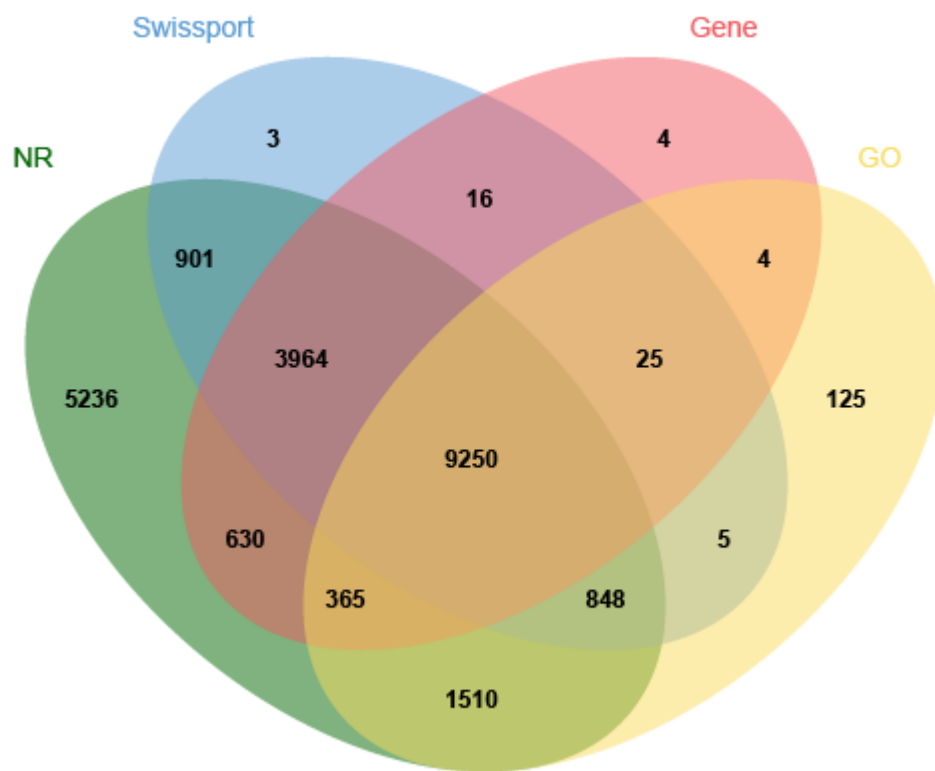

**Figure S3. A Venn diagram of the statistics of the functional annotation.**

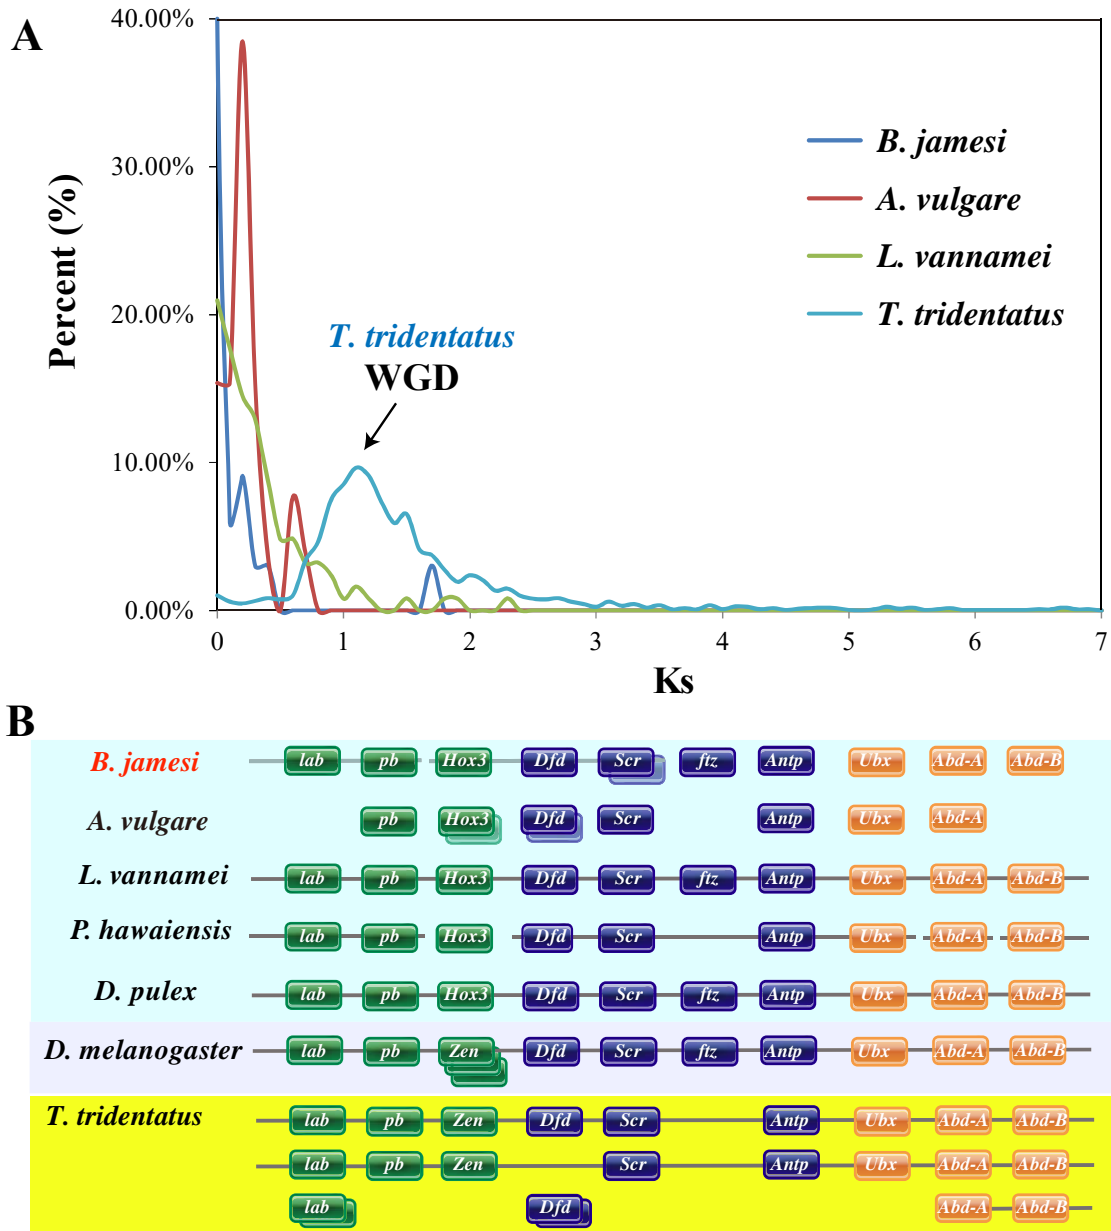

**Figure S4. Whole-genome duplication analysis of *B. jimesi*.** (A) Distribution of the synonymous substitution rates (Ks) of homologous gene groups for intraspecies comparison. The peak of the arrow indicates WGD event in the *Tachypleus tridentatus* genome. *B. jimesi* seems have not undergone WGD as no peak relates to WGD has been found in this genome. (B) Hox gene clusters of seven arthropods. The boxes connected by a straight line represented ordered genes on a single scaffold or pseudochromosome. Unlike the duplicated Hox gene cluster in the *T. tridentatus* genome, only a single Hox gene cluster identified in both *B. jimesi* and *A. vulgare*.

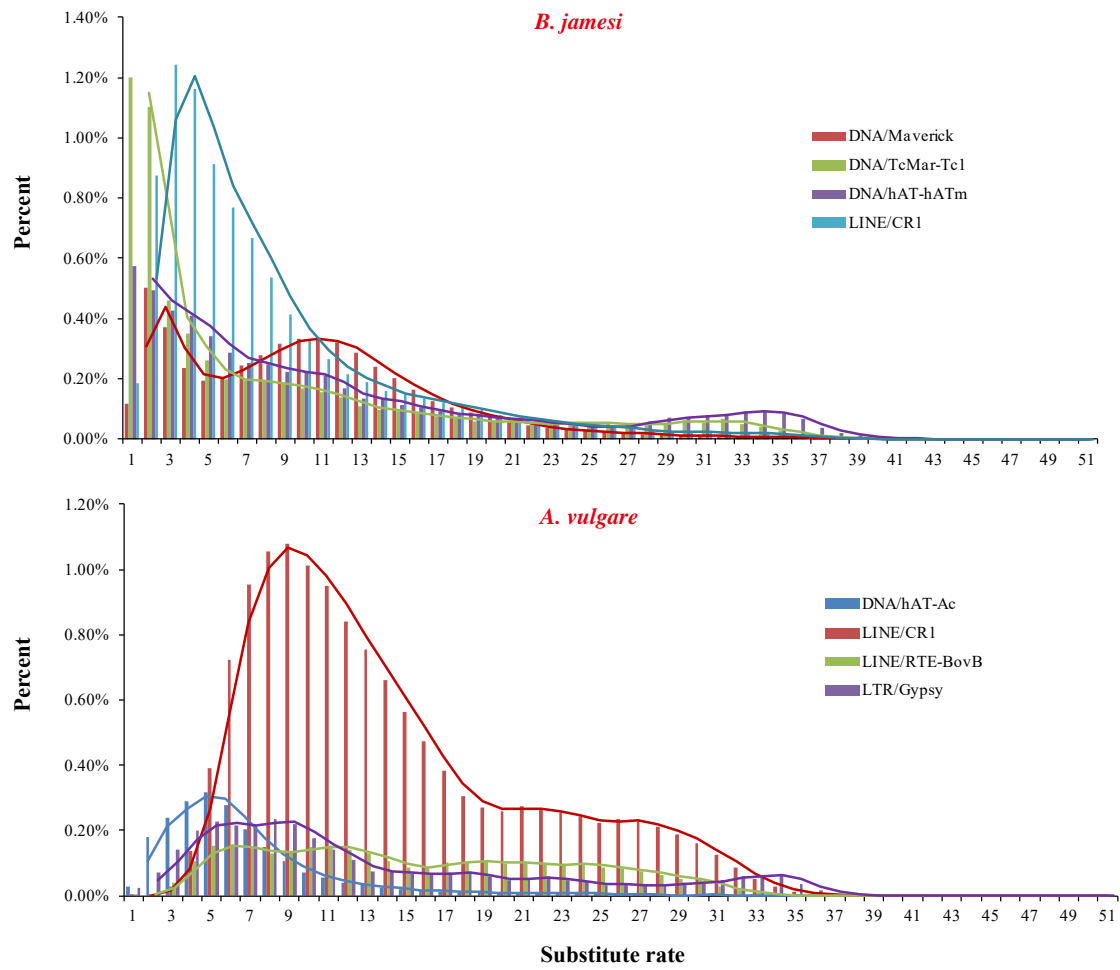

**Figure S5. Age distribution of major expanded TEs in the two isopod genomes.** The substitution rates were calculated between the genome and repeat consensus sequences.

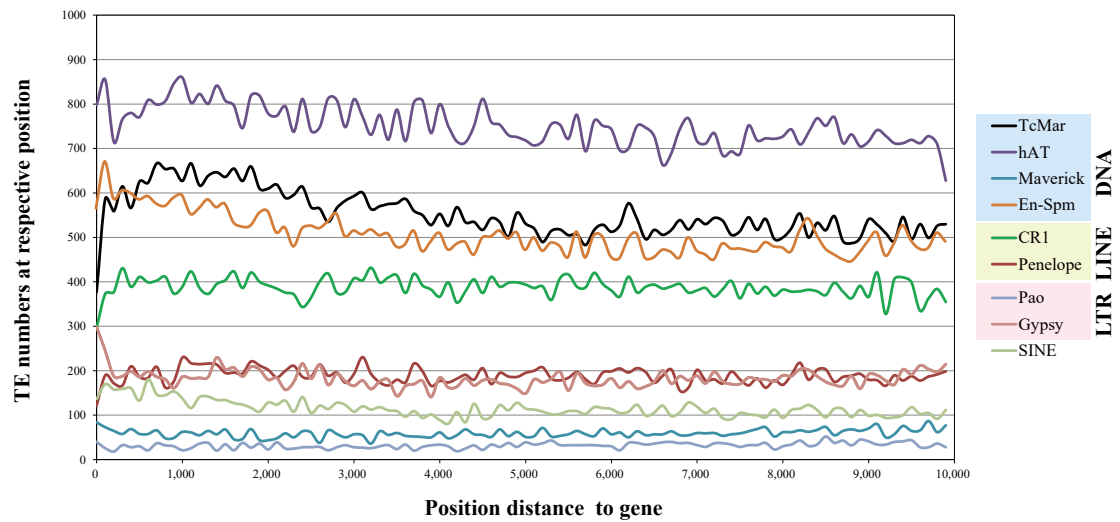

**Figure S6. The TE distribution surrounding genes.** For each gene, the 10 Kb upstream or downstream of the gene body were analyzed. The plots include only those proliferated in the *B. jamesi* genome.

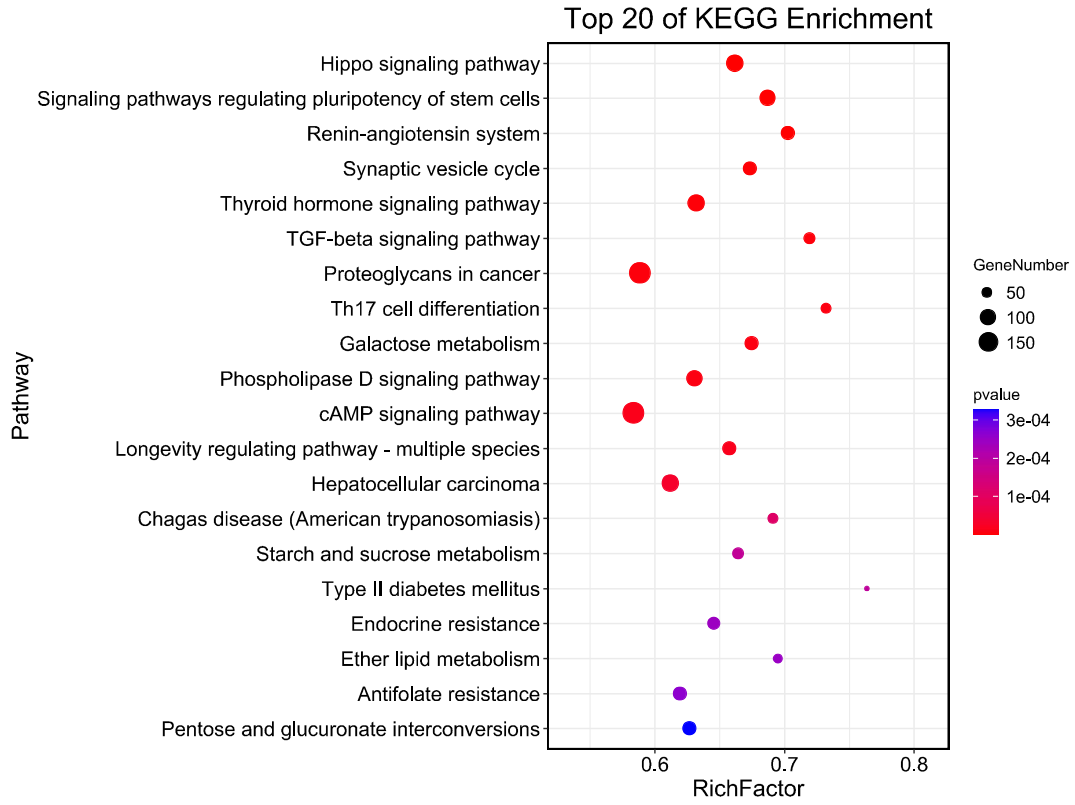

**Figure S7. KEGG enrichment of the expanded gene families of *B. jamesi*.**

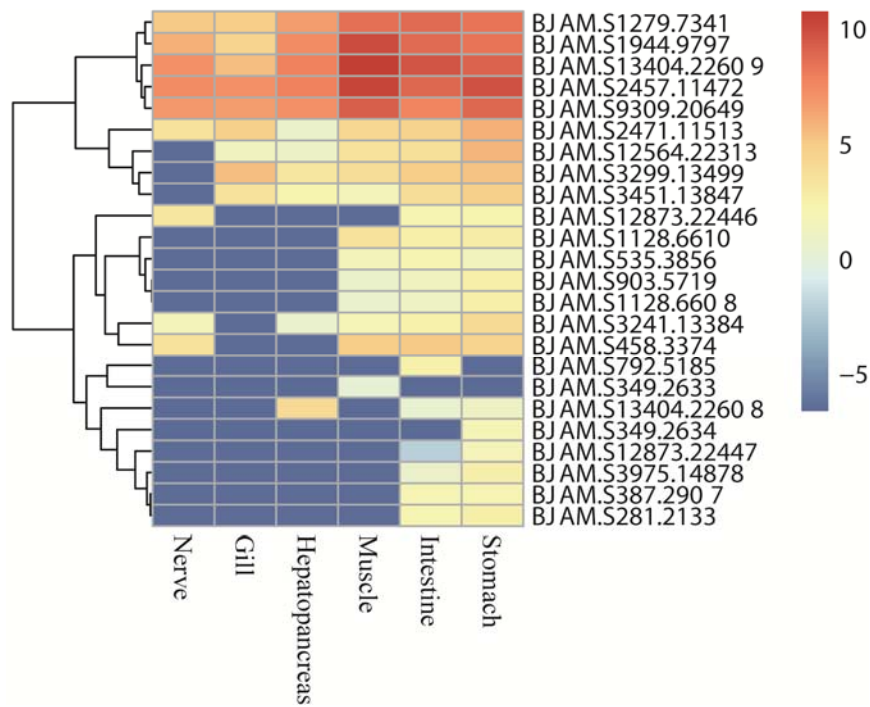

**Figure S8.** Expression level of the genes involved in the glycolysis of *B. jamesi*.

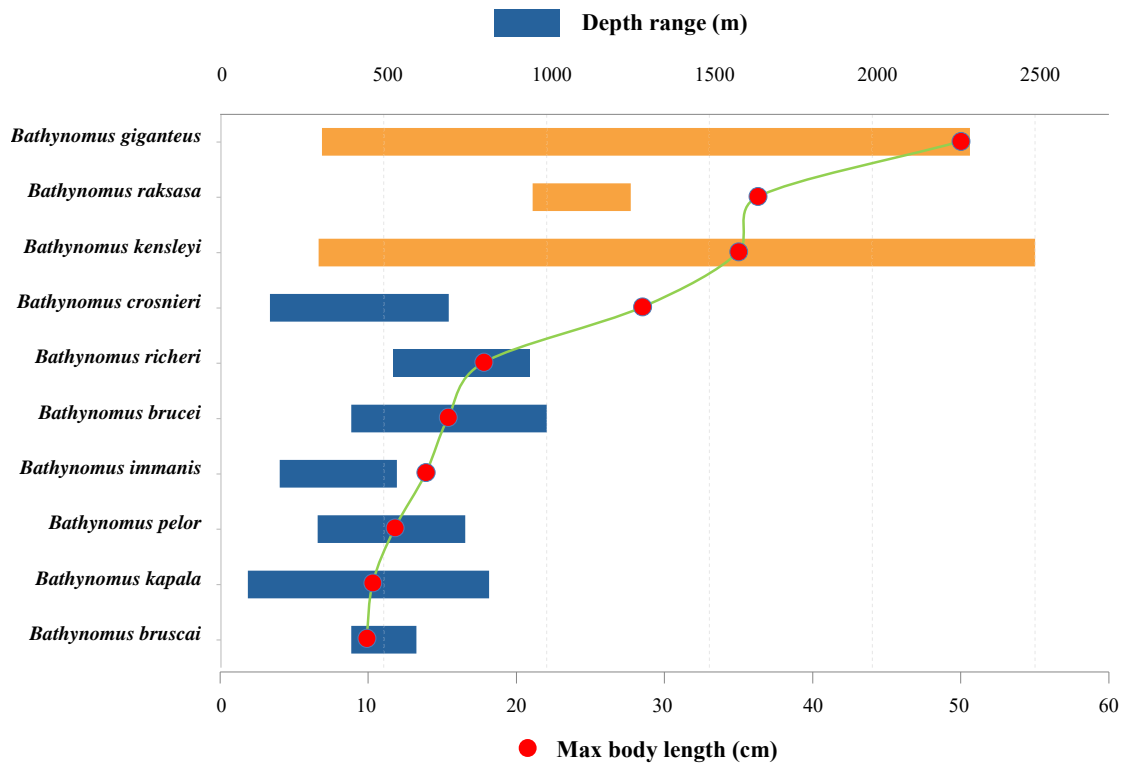

**Figure S9. The distribution ranges and max body lengths of the species of genus *Bathynomus*.** The information of distribution range and max body length of these species were collected from the SeaLifeBase (<https://www.sealifebase.ca/search.php>).
